# Supplementary material
Source: PubMed Central journal article supplement (PMC2858308)

**Supplemental Figure 1. Immunofluorescent analysis of the liver of mice with PanIN lesions.** Immunofluorescent microscopic analysis of the liver of wildtype and LSL-Kras<sup>G12D</sup> mice (6 months old) using antibodies against Gr-1 and CD11b reveals expansion of cells expressing these markers in mice with PanIN lesions in their pancreata.

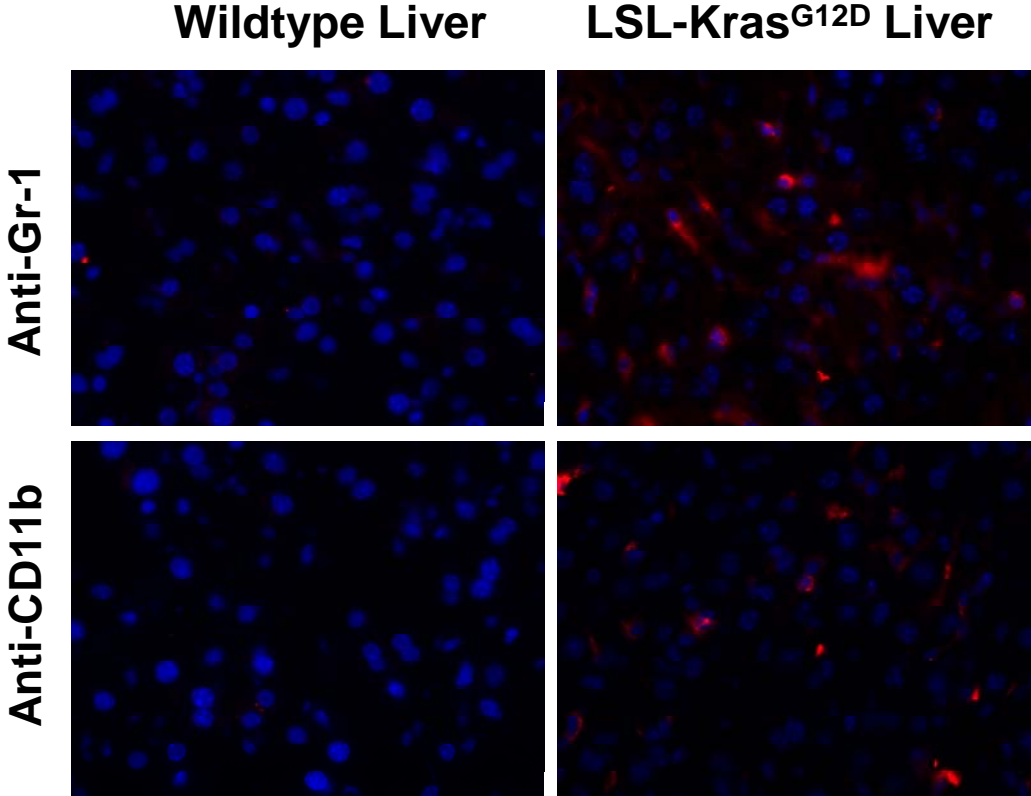

**Supplemental Figure 2. Hepatic CD11b<sup>+</sup>Gr1<sup>high</sup> and CD11b<sup>+</sup>Gr1<sup>inter</sup> cells have distinct surface phenotypes.** Liver CD11b<sup>+</sup>Gr1<sup>high</sup> and CD11b<sup>+</sup>Gr1<sup>inter</sup> populations from mice with i.p. MCA38 tumors were analyzed by flow cytometry for expression of a variety of surface markers. The MFI for each analysis is indicated below its respective histogram. Shaded histograms represent spleen isotype controls using bulk CD11b<sup>+</sup>Gr1<sup>+</sup> cells. Similar isotype staining was noted for the CD11b<sup>+</sup>Gr1<sup>high</sup> and CD11b<sup>+</sup>Gr1<sup>inter</sup> subsets.

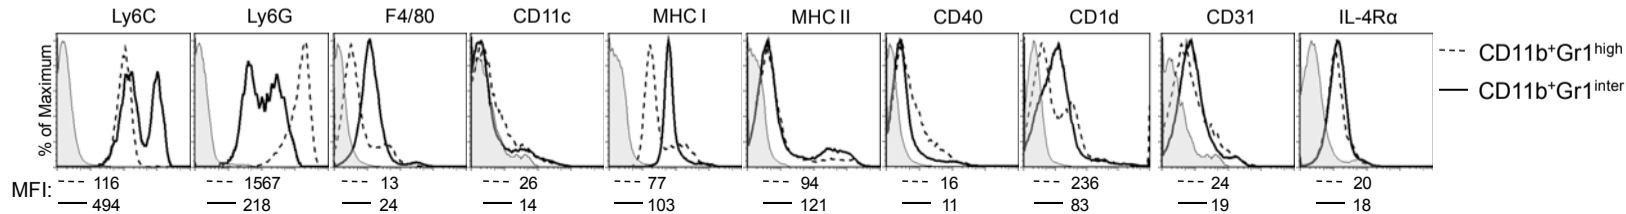

**Supplemental Figure 3. Liver and spleen CD11b<sup>+</sup>Gr1<sup>+</sup> and CD11b<sup>+</sup>Gr1<sup>inter</sup> cells have distinct surface phenotypes.** Liver and spleen CD11b<sup>+</sup>Gr1<sup>+</sup> populations from mice harboring i.p. MCA38 tumors were analyzed by flow cytometry for expression of a variety of surface markers. The MFI for each analysis is indicated below its respective histogram. Shaded histograms represent spleen isotype controls which were very similar liver isotype controls.

..... Spleen CD11b<sup>+</sup>Gr1<sup>+</sup>

— Liver CD11b<sup>+</sup>Gr1<sup>+</sup>

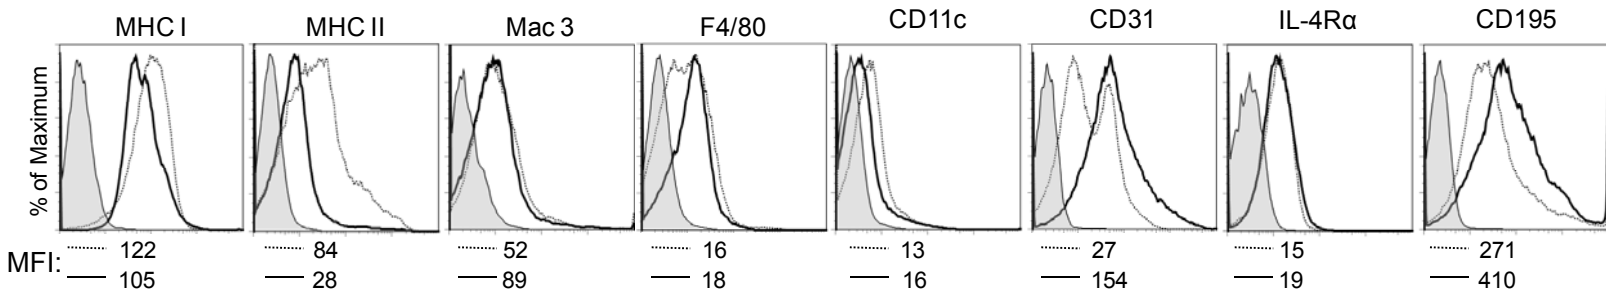

**Supplemental Figure 4. Liver and spleen CD11b<sup>+</sup>Gr1<sup>+</sup> cells produce similar amounts of nitric oxide.** Nitric oxide production *in vitro* by liver and spleen CD11b<sup>+</sup>Gr1<sup>+</sup> cells cultured for 24h was measured by the Griess reaction.

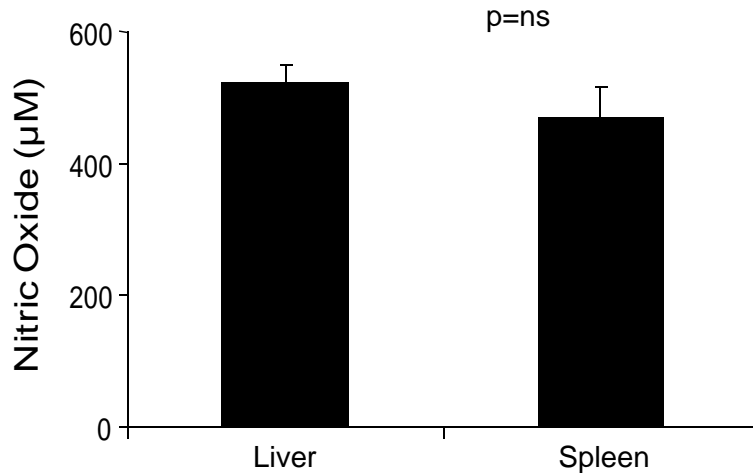

**Supplemental Figure 5. Liver CD11b<sup>+</sup>Gr1<sup>inter</sup> cells produce higher levels of inflammatory mediators compared with spleen.** Liver and spleen CD11b<sup>+</sup>Gr1<sup>inter</sup> populations were FACS sorted from mice with i.p. MCA38 tumors and cultured for 24h at a concentration of 2x10<sup>5</sup> cells/ml. This experiment was repeated twice using 3 mice per group.

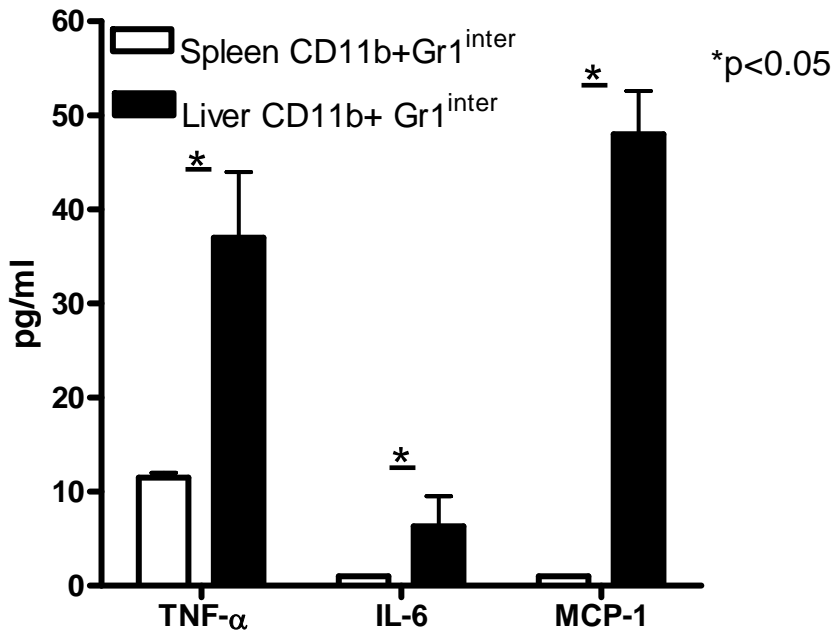

Supplement: jlb.0909607_1.pdf [file jlb.0909607_1.pdf]
